# Supplementary material for: Neoadjuvant Chemotherapy–Guided Bladder-Sparing Treatment for Muscle-Invasive Bladder Cancer: Results of a Pilot Phase II Study
Source: PubMed Central journal article supplement — Cancer Res Treat. 2021 Feb 10;53(4):1156–65. doi: 10.4143/crt.2020.1356 (PMC8524034; doi:10.4143/crt.2020.1356), 2021-02-10
Supplement: crt-2020-1356-suppl.pdf [file crt-2020-1356-suppl.pdf]

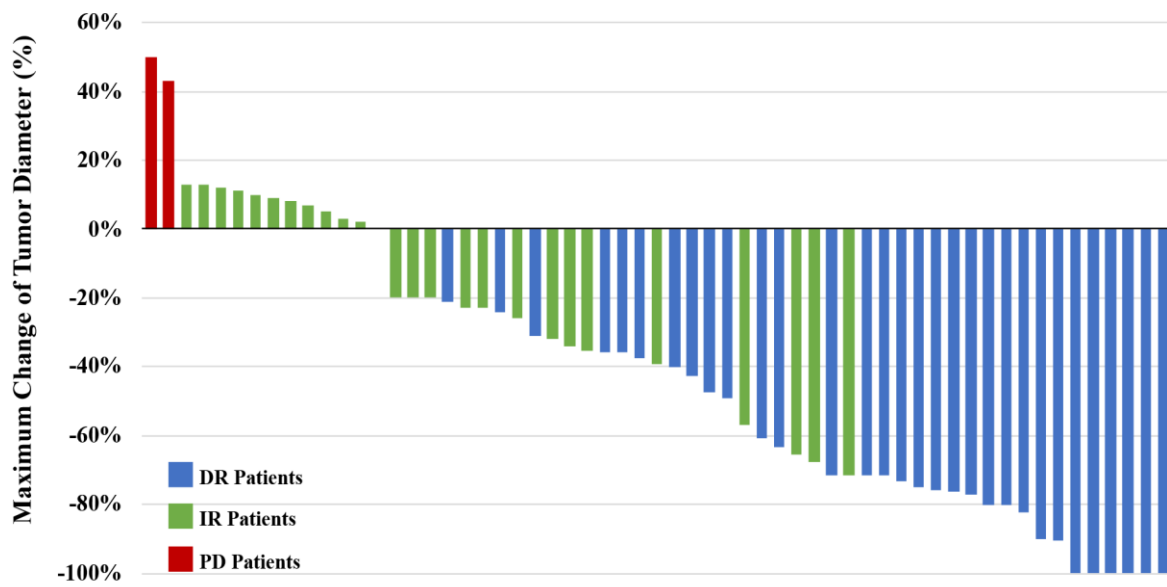

**S1 Fig.** Proportions of the maximum tumor diameter shrinkage. Columns colored blue show the tumor shrinkage percentage of 31 definite responders and those colored green analogously represent 26 incomplete responders, while red indicates two patients with progressive disease.
